# Supplementary material for: Electrochromic and electroluminescent devices based on a novel branched quasi-dendric fluorene-carbazole-2,5-bis(2-thienyl)-1H-pyrrole system
Source: Royal Society of Chemistry journal article supplement (doi:10.1039/c0jm02366c), 2011-01-01
Supplement: c0jm02366c.pdf [file c0jm02366c.pdf]

### Electronic Supplementary Information (ESI)

#### Figure Titles

**Figure S1.**  $^1\text{H}$  NMR spectrum of compound **2**.

**Figure S2.**  $^1\text{H}$  NMR spectrum of compound **3**.

**Figure S3.**  $^1\text{H}$  NMR spectrum of **FCSNS**.

**Figure S4.** MALDI-TOF spectra of **FCSNS**; full range (**a**), expended (**b**) and computer simulated (**c**).

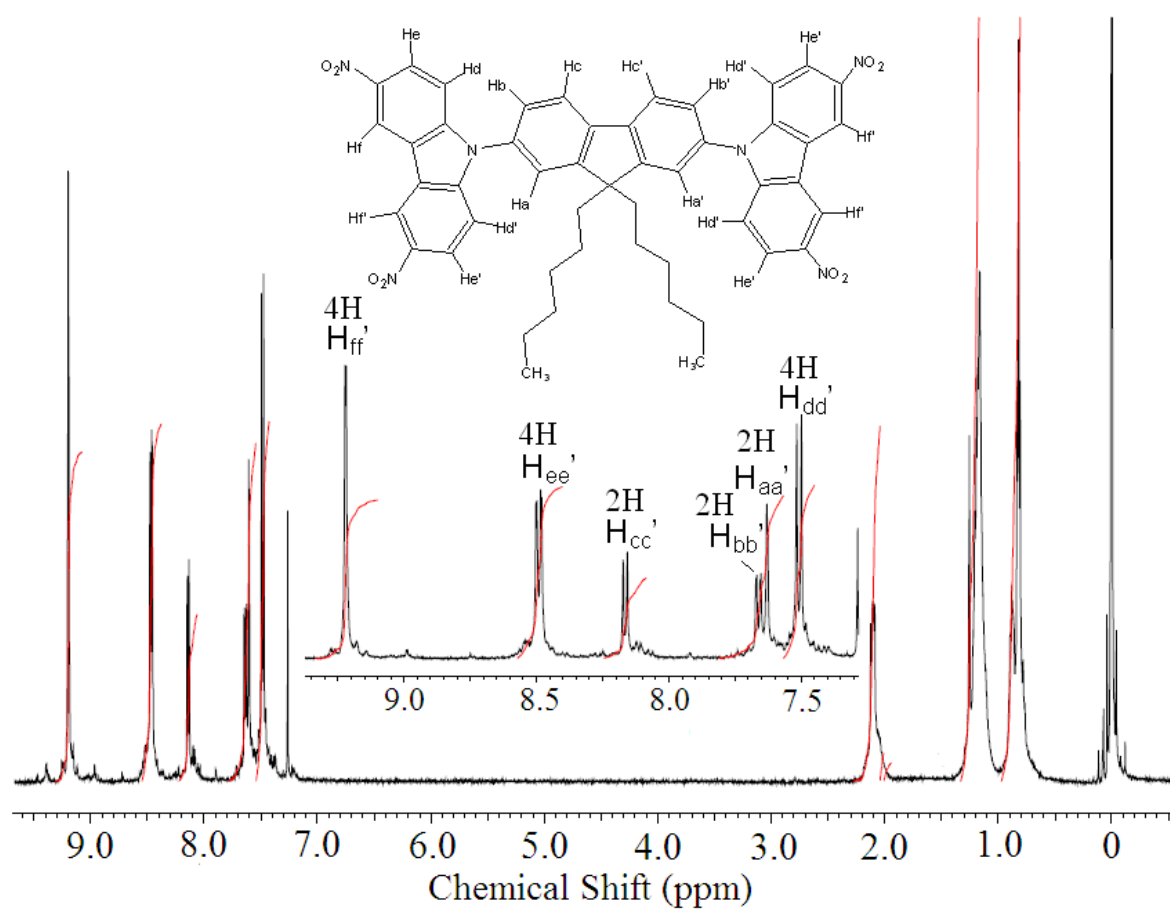

Figure S1

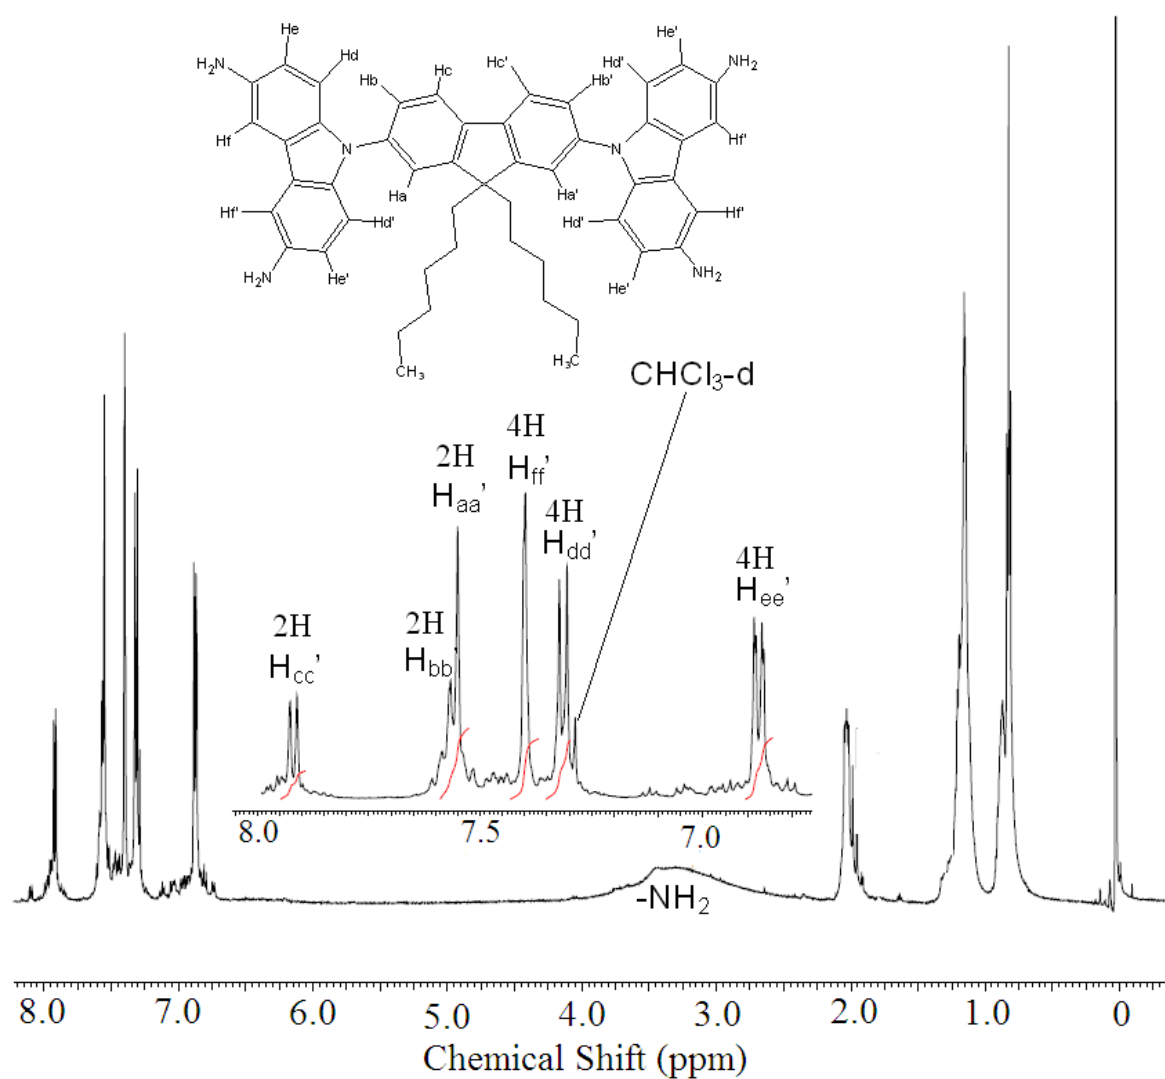

Figure S2

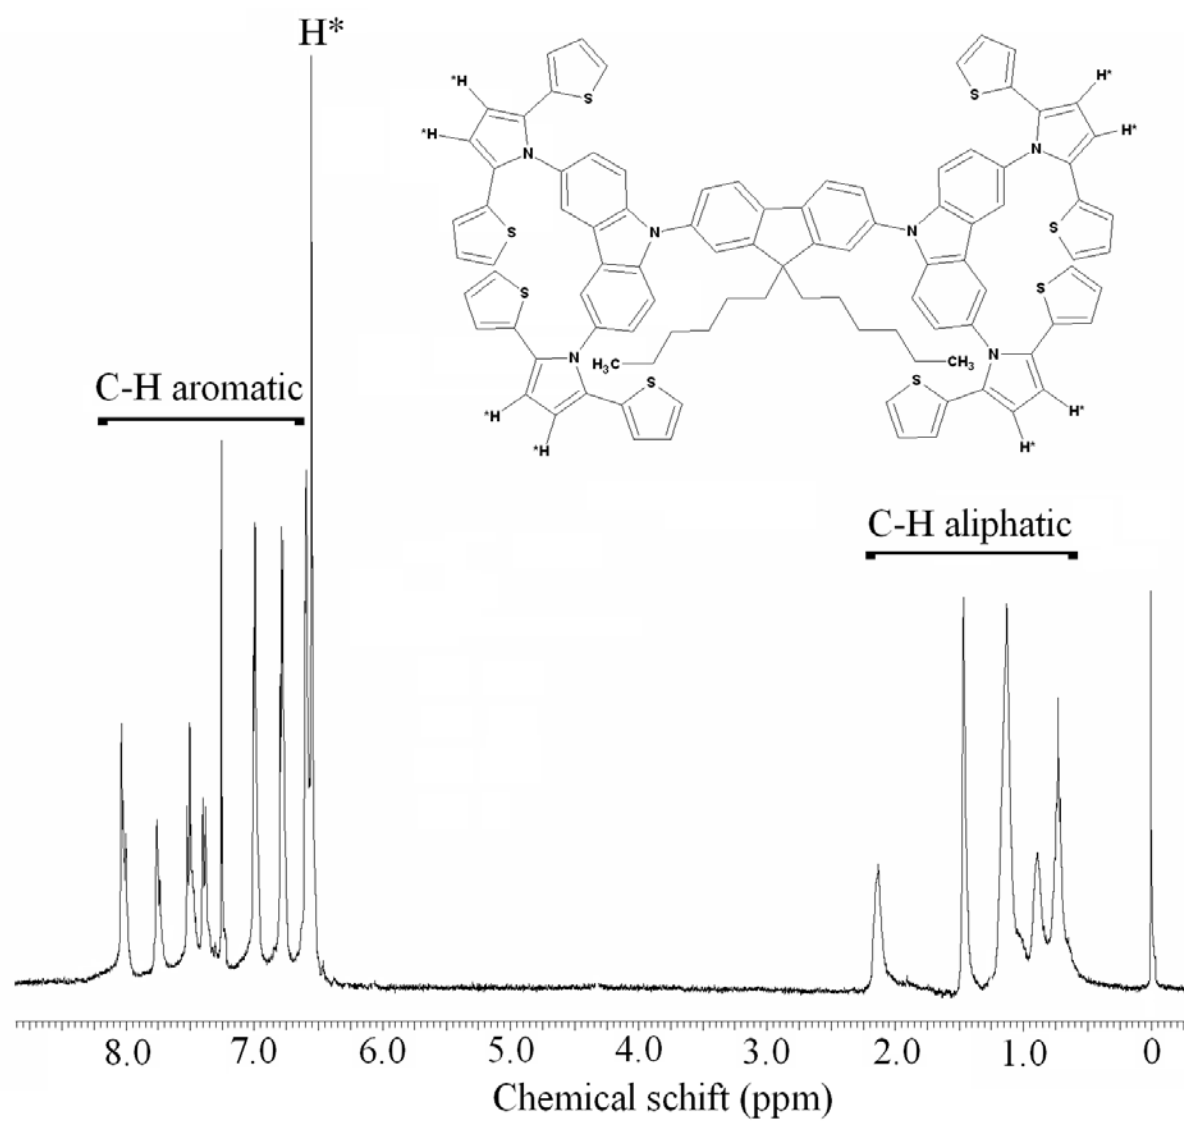

Figure S3

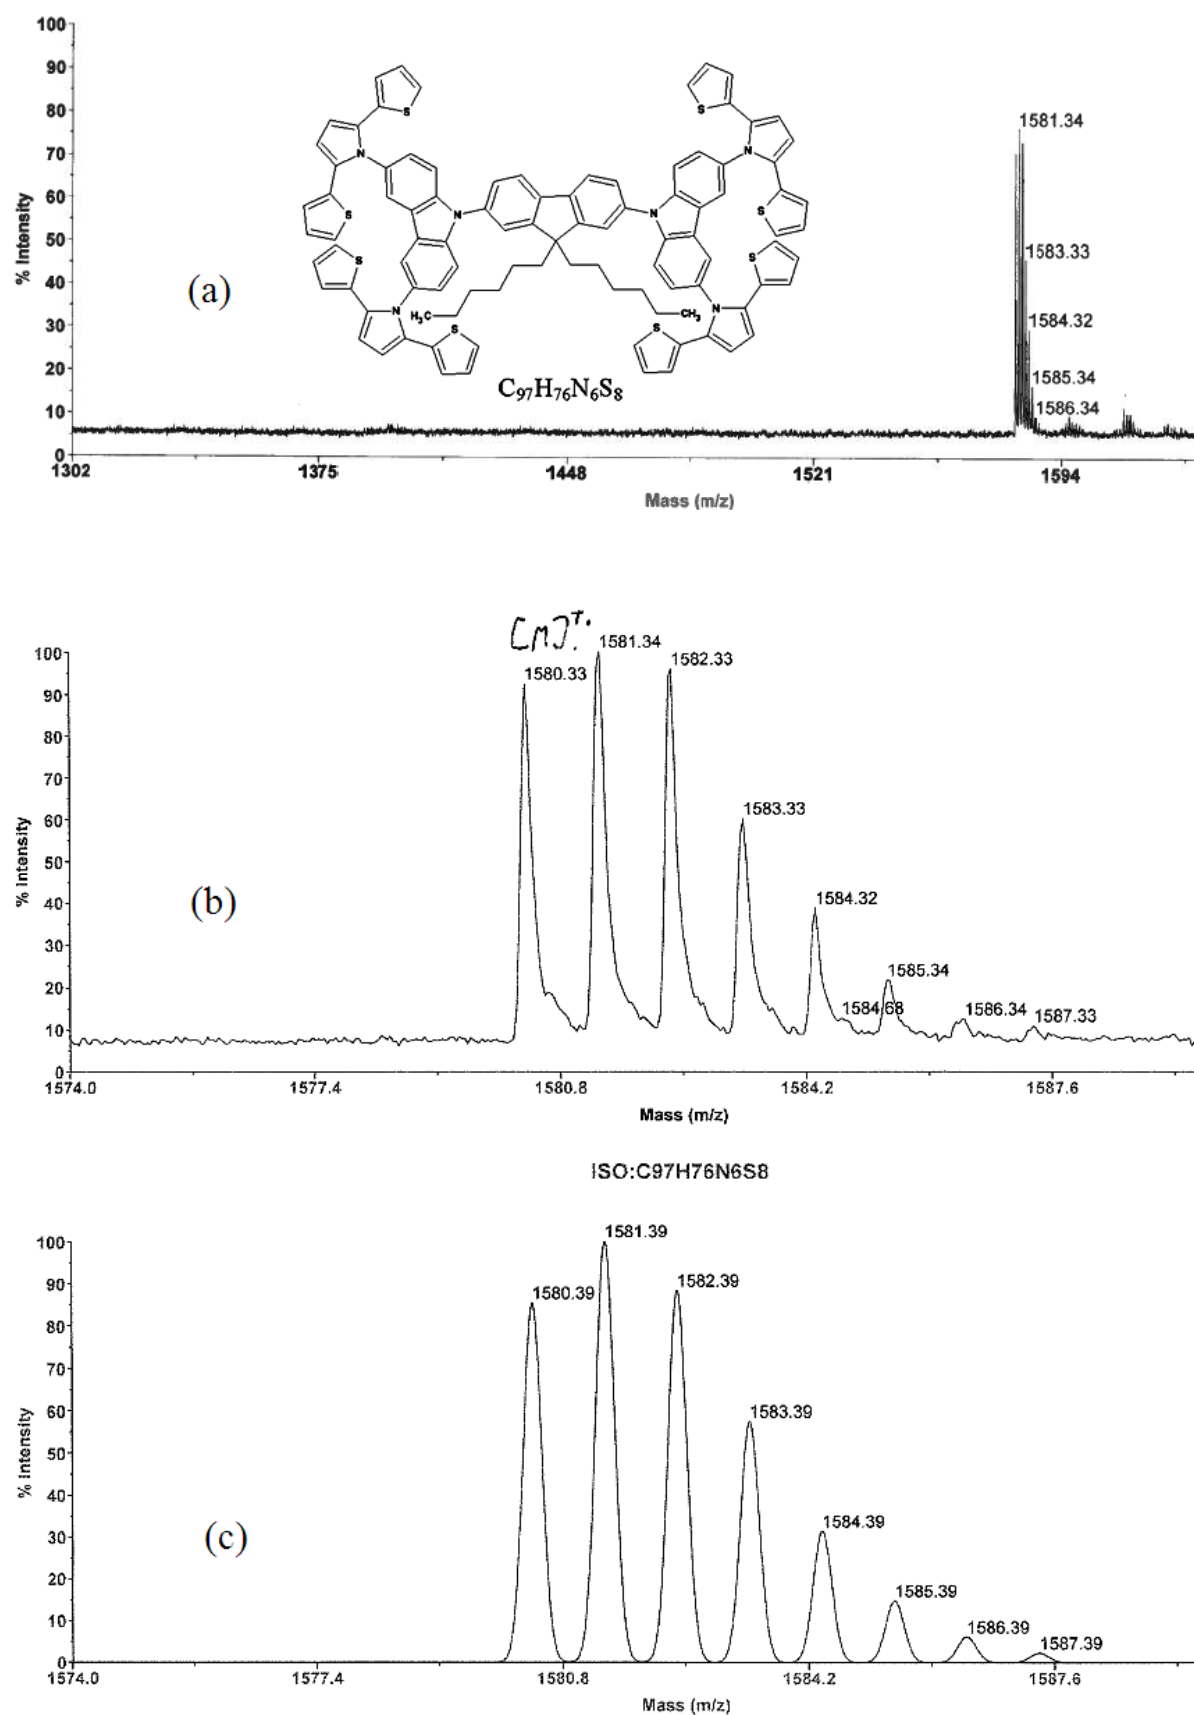

Figure S4
